# Supplementary material for: Dasatinib and Doxorubicin Treatment of Sarcoma Initiating Cells: A Possible New Treatment Strategy
Source: Hindawi journal article supplement (doi:10.1155/2016/9601493), 2015-12-15

**Supplementary table I**

| <b>Assay</b> | <b>Forward primer</b>               | <b>Reverse primer</b>                | <b>Annealing temp</b> |
|--------------|-------------------------------------|--------------------------------------|-----------------------|
| EGFR         | 5'-GAG AAC GCC TCC CTC A-3'         | 5'-GGT ACT CGT CGG CAT C-3'          | 54                    |
| HER2         | 5'-CCA GGA CCT GCT GAA CTG CT-3'    | 5'-TGT ACG AGC CGC ACA TCC-3'        | 59                    |
| HER3         | 5'-AGG GAC CCA GGT CTA CGA TG-3'    | 5'-CTC ACT ATG TCC CTC CAG TC-3'     | 60                    |
| HER4         | 5'-ACA GCA GTA CCG AGC CTT TGC G-3' | 5'-GCC ACT AAC ACG TAG CCT GTG AC-3' | 64                    |
| AR           | 5'-GCC TCA GGC CAT TAT GC-3'        | 5'- ACC TGT TCA ACT CTG ACT GA-3'    | 58                    |
| HB-EGF       | 5'-GGT GGT GCT GAA GCT CTT TC-3'    | 5'-CCC CTT GCC TTT CTT CTT TC-3'     | 61                    |
| EPI          | 5'-CAA AGT GTA GCT CTG ACA TG-3     | 5'-CTG TAC CAT CTG CAG AAA TA-3'     | 60                    |

probe HER2: 5'-CAG ATT GCC AGG GGG ATG AGC TAC CTG-3'

**Supplementary figure I** The growth and the sensitivity to doxorubicin of a transformed human mesenchymal (stromal) stem cell line hMSC-TERT4 (solid line) and a derived clonal cell line with the ability to form sarcoma-like tumours in mice hMSC-TERT20-CE8 (CE8 – dashed line). The doxorubicin experiments were performed with 6 replicates. The mean fold change in growth is shown with 95% confidence interval.

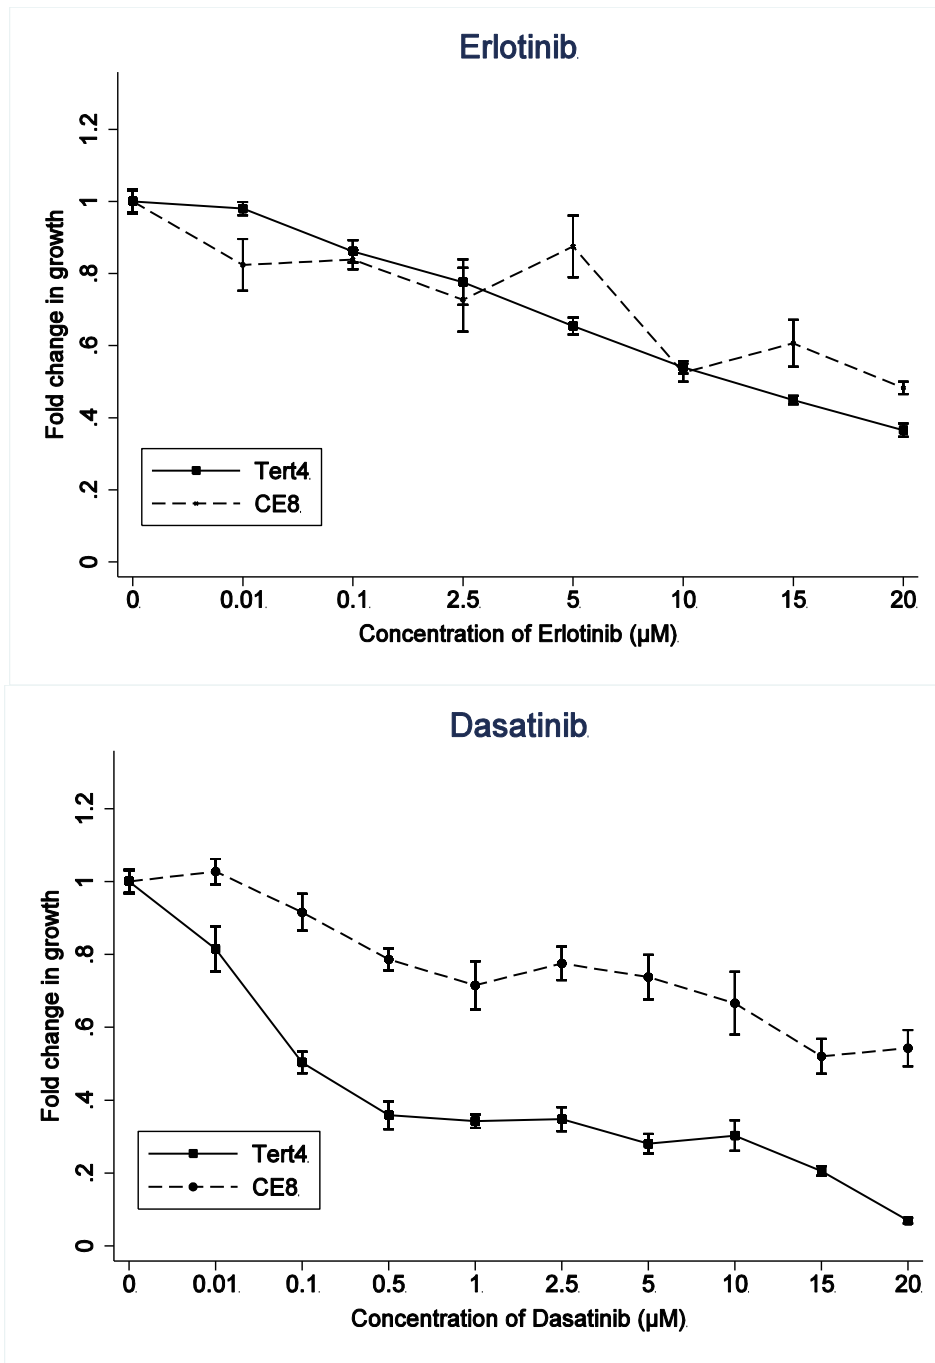

**Supplementary figure II** Quantification of the activated RTK (figure 2) for hMSC\_TERT4 and hMSC-TERT20-CE8. The relative density for each spot was calculated using the control spot as reference.

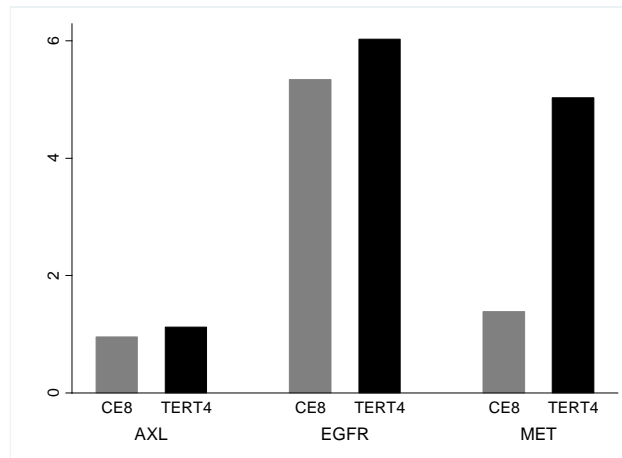

**Supplementary figure III** Quantification of Western blot figure 5. The total (t) and the activated form (p) of EGFR, Src, Akt and MAPK in hMSC-TERT20- CE8 and hMSC –TERT4 were quantified. The cell lines were treated for 72h with vehicle, erlotinib 5 $\mu$ M or dasatinib 5 $\mu$ M. The relative densities were calculated by using the non treated band on the western blot as reference. Black bars represent hMSC-TERT4 and gray bars represent hMSC-TERT-CE8.

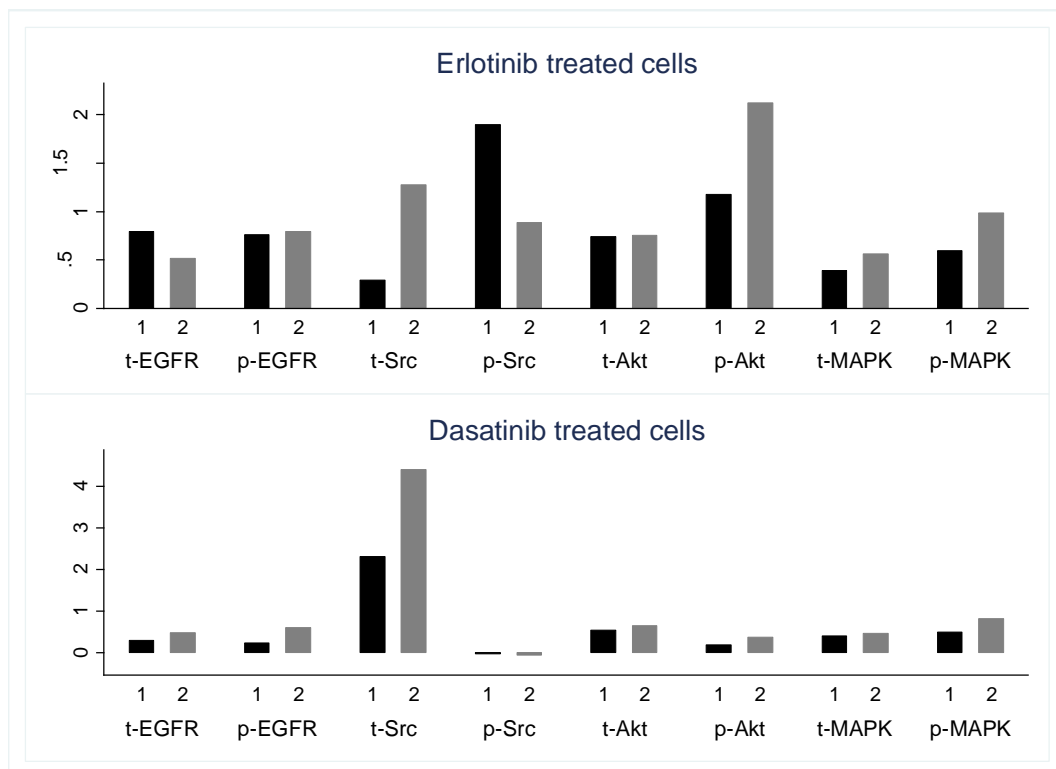

Supplement: f1 [file 9601493.f1.pdf]
